# Supplementary material for: Association between SNPs in microRNA machinery genes and gastric cancer susceptibility, invasion, and metastasis in Chinese Han population
Source: PubMed Central journal article supplement (PMC5689696; doi:10.18632/oncotarget.21199), 2017-09-23
Supplement: oncotarget-08-86435-s001.pdf [file oncotarget-08-86435-s001.pdf]

## Association between SNPs in microRNA machinery genes and gastric cancer susceptibility, invasion, and metastasis in Chinese Han population

### SUPPLEMENTARY MATERIALS

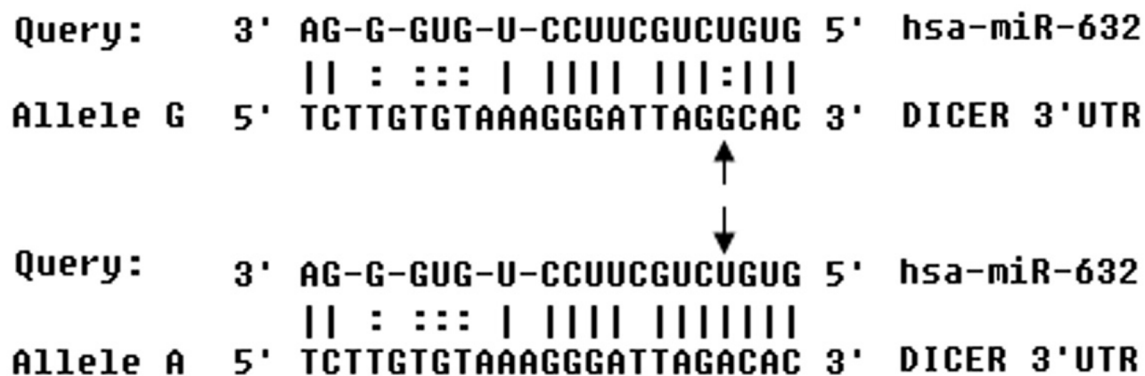

Supplementary Figure 1: *In-silico* analysis of microRNA-binding. rs3742330 was located at the fourth nucleotides from 5' end of the has-miR-632. The arrows indicated the position of rs3742330.



**PolyPhen-2** prediction of functional effects of human nsSNPs

Home About Help Downloads Batch query WHES.db

**PolyPhen-2 report for P57678 R1033C (rs7813)**

**Query**

| Protein Acc            | Position | AA <sub>1</sub> | AA <sub>2</sub> | Description                                                                                                                          |
|------------------------|----------|-----------------|-----------------|--------------------------------------------------------------------------------------------------------------------------------------|
| <a href="#">P57678</a> | 1033     | R               | C               | Canonical; RecName: Full=Gem-associated protein 4; Short=Gemin-4; AltName: Full=Component of gems 4; AltName: Full=p97; Length: 1058 |

**Results**

Prediction/Confidence PolyPhen-2 v2.2.2r398

**HumDiv**

This mutation is predicted to be **PROBABLY DAMAGING** with a score of 0.995 (sensitivity: 0.68; specificity: 0.97)



0.00 0.20 0.40 0.60 0.80 1.00

HumVar

**Details**

Multiple sequence alignment UniProtKB/UniRef100 Release 2011\_12 (14-Dec-2011)

3D Visualization PDB/DSSP Snapshot 03-Jan-2012 (78304 Structures)

Software & web support: [ivan adzhubey](#) Web design & development: [biobite solutions](#)

Supplementary Figure 2: The predicted analysis for rs7813.

Supplementary Table 1: MiRNA-related genes and polymorphisms evaluated in this study

| Gene          | SNP ID           | Position           | Major/minor allele | MAF%         |
|---------------|------------------|--------------------|--------------------|--------------|
| <i>DROSHA</i> | rs642321         | 3'UTR              | C/T                | 0.467        |
|               | rs6877568        | 5'UTR              | A/C                | 0.216        |
|               | <b>rs10719</b>   | <b>3'UTR</b>       | <b>C/T</b>         | <b>0.233</b> |
| <i>DGCR8</i>  | rs3757           | 3'UTR              | A/G                | 0.178        |
|               | rs720012         | 3'UTR              | A/G                | 0.444        |
|               | rs417309         | 3'UTR              | A/G                | 0.100        |
|               | rs1640299        | 3'UTR              | G/T                | 0.222        |
| <i>RAN</i>    | rs14035          | 3'UTR              | C/T                | 0.178        |
| <i>DICER</i>  | <b>rs3742330</b> | <b>3'UTR</b>       | <b>A/G</b>         | <b>0.267</b> |
| <i>AGO1</i>   | rs595961         | intron             | A/G                | 0.128        |
|               | <b>rs636832</b>  | <b>intron</b>      | <b>A/G</b>         | <b>0.198</b> |
| <i>AGO2</i>   | rs4961280        | promotor           | A/C                | 0.111        |
| <i>GEMIN4</i> | rs104591         | 3'UTR              | A/G                | 0.148        |
|               | rs104581         | Coding exon        | C/T                | 0.133        |
|               | <b>rs7813</b>    | <b>Coding exon</b> | <b>C/T</b>         | <b>0.289</b> |
|               | rs2740349        | Coding exon        | A/G                | 0.211        |
|               | <b>rs3744741</b> | <b>Coding exon</b> | <b>C/T</b>         | <b>0.267</b> |
| <i>GEMIN3</i> | rs197412         | Coding exon        | C/T                | 0.333        |
| <i>HIWI</i>   | rs1106042        | Coding exon        | A/G                | 0.122        |
|               | rs10773771       | 3'UTR              | G/T                | 0.409        |
